# Supplementary material for: A Multitrait Locus Regulates Sarbecovirus Pathogenesis
Source: PubMed Central journal article supplement (PMC9426612; doi:10.1128/mbio.01454-22), 2022-07-12
Supplement: mbio.01454-22-s0004.pdf [file mbio.01454-22-s0004.pdf]

# Table S1

Basal\_Seq (2)

| Strain | Class | CCR9.Liv | CCR9.Kid | CCR9.Ht | CXCR6.Liv | CXCR6.Kid | CXCR6.Ht | XCR1.Liv | XCR1.Kid | XCR1.Ht | LZTFL1.Liv | LZTFL1.Kid | LZTFL1.Ht | FYCO1.Liv | FYCO1.Kid | FYCO1.Ht | SLC6A20B.Liv | SLC6A20B.Kid | SLC6A20B.Ht |
|--------|-------|----------|----------|---------|-----------|-----------|----------|----------|----------|---------|------------|------------|-----------|-----------|-----------|----------|--------------|--------------|-------------|
| CC001  | p     | 5.0942   | 4.7871   | 5.8392  | 5.349     | 4.739     | 5.9672   | 4.8839   | 4.8259   | 5.6648  | 8.5261     | 9.4575     | 9.0498    | 11.2655   | 11.1361   | 13.5345  | 4.6917       | 11.5407      | 5.1919      |
| CC011  | p     | 5.0016   | 5.1099   | 7.1759  | 4.438     | 4.7545    | 5.849    | 4.6836   | 4.5831   | 5.423   | 8.4163     | 9.5128     | 9.2282    | 11.2307   | 11.1413   | 13.7246  | 4.438        | 12.024       | 5.1919      |
| CC015  | p     | 4.8306   | 4.6154   | 5.7753  | 4.663     | 5.0498    | 6.0737   | 5.2146   | 4.7052   | 6.1117  | 8.3525     | 9.5224     | 9.1634    | 11.6362   | 11.3682   | 13.5997  | 4.4727       | 11.9893      | 5.7041      |
| CC025  | p     | 5.1712   | 4.9381   | 5.6846  | 4.9427    | 4.6773    | 5.5162   | 5.0924   | 4.7954   | 5.7694  | 8.2529     | 9.4876     | 9.1442    | 11.206    | 11.2029   | 13.6806  | 4.4999       | 11.9355      | 5.5759      |
| CC029  | a     | 4.764    | 4.6352   | 5.938   | 4.8046    | 4.3202    | 5.6199   | 4.7478   | 4.9505   | 6.0327  | 8.4996     | 9.7361     | 9.6589    | 11.0995   | 10.7345   | 14.0004  | 4.4122       | 12.6124      | 5.7151      |
| CC045  | a     | 4.953    | 4.8883   | 5.5524  | 5.2101    | 4.9223    | 5.6582   | 5.2178   | 5.0154   | 5.7795  | 8.2331     | 10.0202    | 9.6293    | 10.8453   | 11.0464   | 13.8474  | 4.5025       | 12.9219      | 5.4956      |
| CC051  | a     | 4.8261   | 4.7771   | 7.9224  | 5.287     | 4.9332    | 6.0919   | 5.0173   | 4.7536   | 6.3416  | 8.5401     | 9.7245     | 9.5628    | 10.9689   | 10.6005   | 13.7416  | 4.2537       | 12.3666      | 5.5739      |
| CC059  | a     | 5.3141   | 4.7684   | 6.9889  | 5.8097    | 5.5077    | 6.2412   | 4.9692   | 5.2876   | 6.0868  | 8.1732     | 9.8995     | 9.5278    | 10.9814   | 10.9644   | 13.7105  | 4.4522       | 12.5108      | 5.5183      |
